# Supplementary material for: Positive association between physical activity and PER3 expression in older adults
Source: PubMed Central journal article supplement (PMC5206642; doi:10.1038/srep39771), 2017-01-03
Supplement: srep39771-s1.pdf [file srep39771-s1.pdf]

## Positive association between physical activity and *PER3* expression in older adults

Masaki Takahashi, Atsushi Haraguchi, Yu Tahara, Natsumi Aoki, Mayuko Fukazawa, Kumpei Tanisawa, Tomoko Ito, Takashi Nakaoka, Mitsuru Higuchi, Shigenobu Shibata

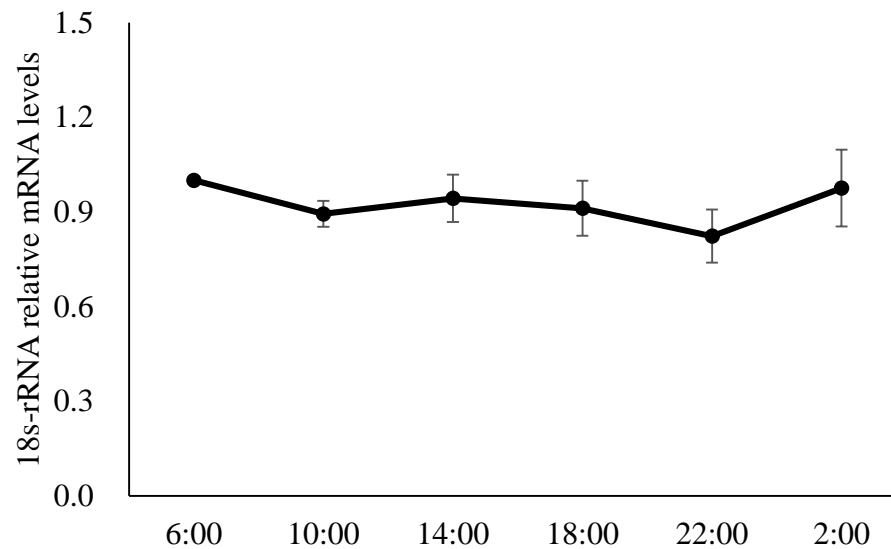

**Figure S1.** The diurnal 18s-rRNA expression in hair follicle cells (n = 20). Data are means  $\pm$  SE.

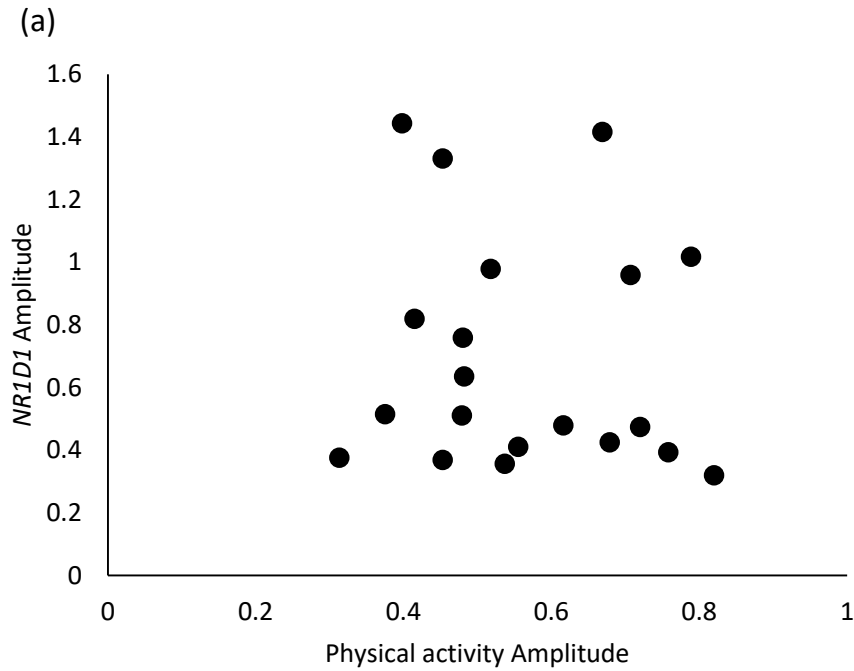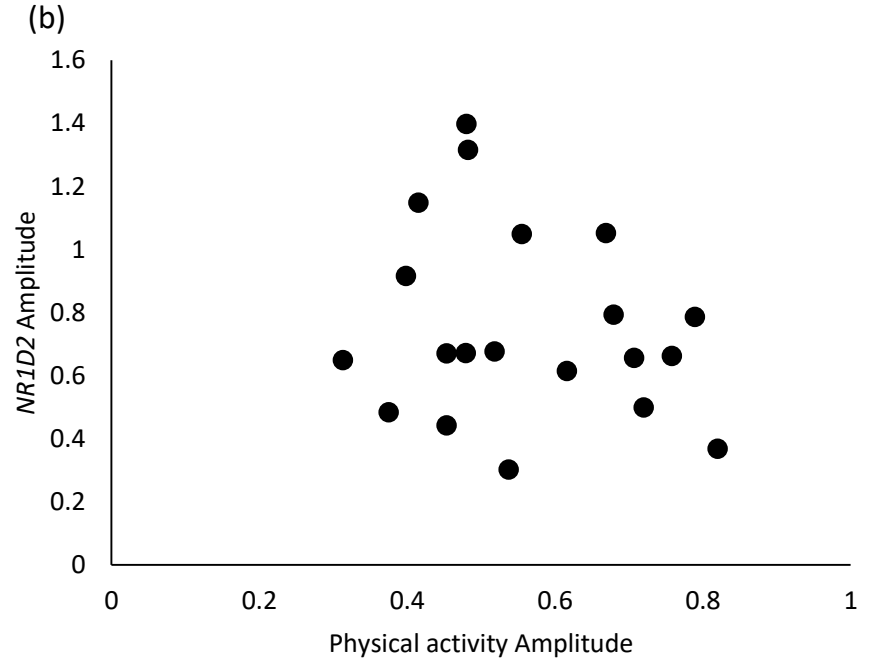

**Figure S2.** The relationship across all participants between amplitude of physical activity and expression of *NR1D1* (a) and *NR1D2* (b) ( $n = 20$ ).

Table S1  
 Amplitude and acrophase of clock genes expression and physical activity in each participants

| ID | <i>PER3</i> |           |                 | <i>NR1D1</i> |           |                 | <i>NR1D2</i> |           |                 | Physical activity |           |                 |
|----|-------------|-----------|-----------------|--------------|-----------|-----------------|--------------|-----------|-----------------|-------------------|-----------|-----------------|
|    | Amplitude   | Acrophase | Goodness of fit | Amplitude    | Acrophase | Goodness of fit | Amplitude    | Acrophase | Goodness of fit | Amplitude         | Acrophase | Goodness of fit |
| 1  | 0.910       | 8.8       | 0.083           | 0.960        | 11.6      | 0.094           | 0.657        | 8.0       | 0.316           | 0.707             | 14        | 0.067           |
| 2  | 0.874       | 9.2       | 0.066           | 1.332        | 6.0       | 0.106           | 0.443        | 6.8       | 0.020           | 0.453             | 18        | 0.007           |
| 3  | 1.475       | 6.8       | 0.100           | 0.759        | 2.0       | 0.309           | 1.398        | 6.0       | 0.135           | 0.48              | 16        | 0.028           |
| 4  | 0.987       | 6.0       | 0.113           | 1.416        | 2.0       | 0.225           | 1.052        | 6.0       | 0.107           | 0.669             | 14.8      | 0.016           |
| 5  | 0.696       | 6.4       | 0.020           | 0.369        | 2.0       | 0.247           | 0.671        | 2.0       | 0.187           | 0.453             | 16.4      | 0.038           |
| 6  | 0.914       | 9.2       | 0.095           | 0.320        | 11.2      | 0.349           | 0.368        | 8.0       | 0.506           | 0.82              | 14.4      | 0.072           |
| 7  | 1.019       | 2.0       | 0.187           | 1.444        | 1.6       | 0.262           | 0.916        | 2.0       | 0.096           | 0.398             | 15.6      | 0.148           |
| 8  | 1.588       | 6.8       | 0.075           | 0.411        | 6.0       | 0.189           | 1.049        | 6.0       | 0.022           | 0.555             | 16.4      | 0.033           |
| 9  | 1.524       | 2.0       | 0.103           | 0.636        | 1.2       | 0.408           | 1.316        | 1.6       | 0.063           | 0.482             | 15.6      | 0.026           |
| 10 | 1.025       | 7.2       | 0.063           | 0.820        | 2.0       | 0.062           | 1.149        | 2.0       | 0.225           | 0.415             | 9.6       | 0.195           |
| 11 | 1.524       | 6.8       | 0.070           | 0.425        | 2.0       | 0.095           | 0.794        | 6.0       | 0.035           | 0.679             | 16.8      | 0.01            |
| 12 | 0.703       | 6.0       | 0.129           | 0.511        | 0.4       | 0.239           | 0.672        | 2.0       | 0.294           | 0.479             | 14.8      | 0.073           |
| 13 | 0.630       | 6.4       | 0.023           | 0.376        | 7.2       | 0.262           | 0.650        | 6.4       | 0.060           | 0.313             | 15.2      | 0.019           |
| 14 | 1.145       | 6.0       | 0.051           | 0.479        | 0.0       | 0.053           | 0.615        | 6.0       | 0.124           | 0.616             | 13.6      | 0.058           |
| 15 | 0.631       | 6.0       | 0.052           | 0.474        | 2.0       | 0.067           | 0.499        | 2.0       | 0.071           | 0.72              | 14.8      | 0.031           |
| 16 | 1.753       | 9.2       | 0.150           | 1.018        | 8.4       | 0.207           | 0.787        | 2.0       | 0.148           | 0.789             | 16.4      | 0.003           |
| 17 | 1.252       | 8.0       | 0.054           | 0.393        | 6.4       | 0.189           | 0.663        | 8.4       | 0.033           | 0.758             | 13.2      | 0.055           |
| 18 | 1.194       | 10.0      | 0.157           | 0.979        | 8.0       | 0.043           | 0.677        | 2.0       | 0.205           | 0.518             | 17.6      | 0.017           |
| 19 | 0.593       | 6.4       | 0.161           | 0.515        | 2.0       | 0.052           | 0.484        | 6.0       | 0.069           | 0.375             | 16        | 0.037           |
| 20 | 0.684       | 7.6       | 0.030           | 0.357        | 2.0       | 0.055           | 0.302        | 6.0       | 0.038           | 0.537             | 14.8      | 0.065           |

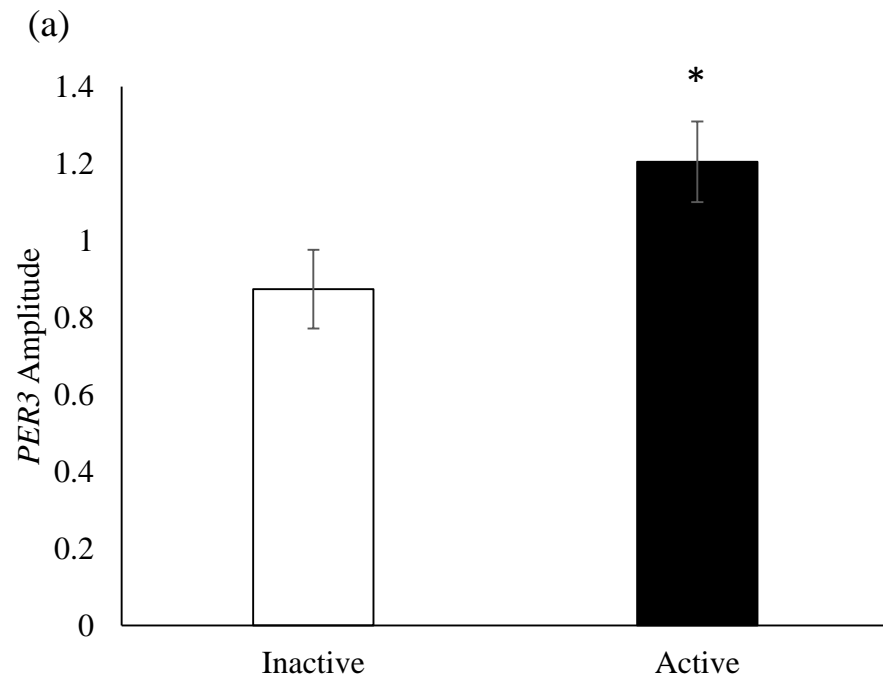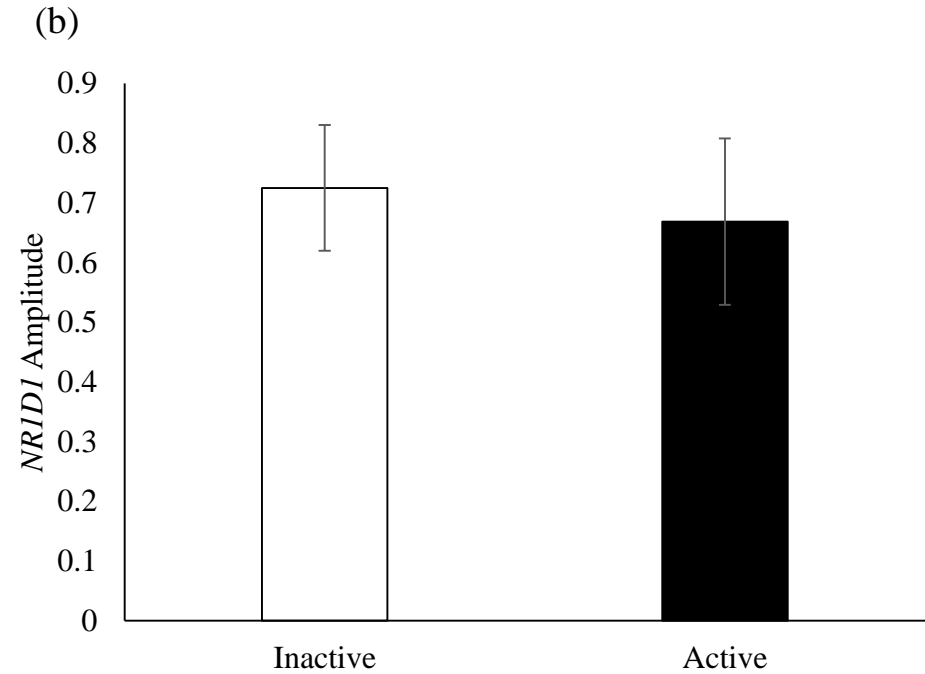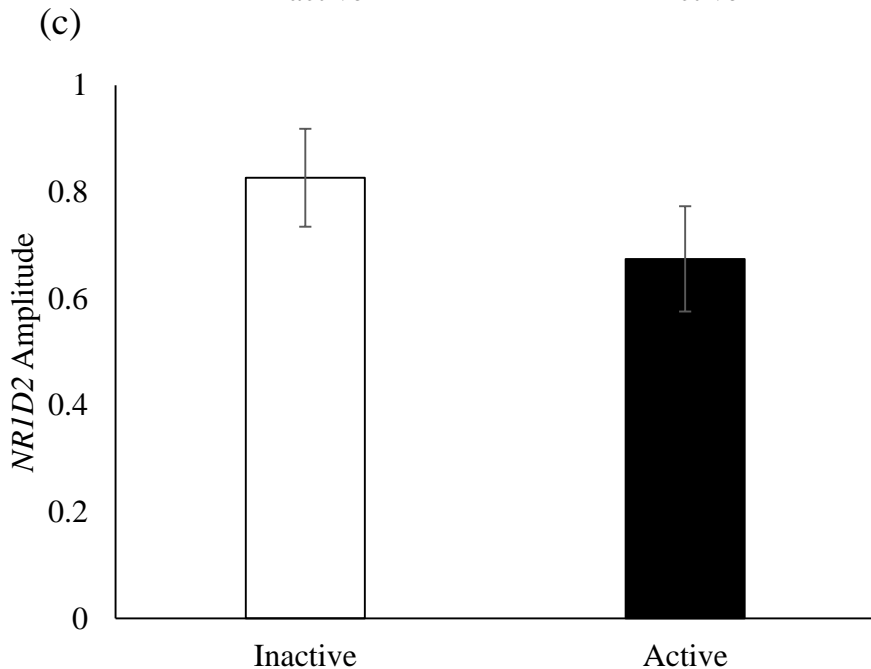

**Figure S3.** The amplitude of *PER3* (a), *NR1D1* (b), *NR1D2* (c) expression in the active (n = 11), and inactive (n = 9) groups. Data are means  $\pm$  SE.\* Significantly different from the value between active and inactive groups (unpaired Student's *t*-tests,  $P < 0.05$ ).

Table S2

The relationships between physical characteristics of the participants and amplitude of clock genes expression (n = 20)

|                               | <i>PER3</i> |          | <i>NR1D1</i> |          | <i>NR1D2</i> |          | Physical activity |          |
|-------------------------------|-------------|----------|--------------|----------|--------------|----------|-------------------|----------|
|                               | Amplitude   |          | Amplitude    |          | Amplitude    |          | Amplitude         |          |
|                               | <i>r</i>    | <i>P</i> | <i>r</i>     | <i>P</i> | <i>r</i>     | <i>P</i> | <i>r</i>          | <i>P</i> |
| Age (years)                   | -0.306      | 0.190    | -0.129       | 0.587    | -0.109       | 0.648    | -0.417            | 0.067    |
| Body mass (kg)                | -0.092      | 0.701    | -0.091       | 0.703    | -0.429       | 0.059    | 0.340             | 0.143    |
| Body mass index               | -0.293      | 0.209    | -0.127       | 0.595    | -0.321       | 0.168    | 0.158             | 0.506    |
| Time of breakfast (24h)       | 0.236       | 0.347    | 0.425        | 0.079    | 0.004        | 0.989    | -0.124            | 0.623    |
| Time of lunch (24h)           | 0.095       | 0.699    | 0.069        | 0.780    | 0.013        | 0.957    | -0.009            | 0.971    |
| Time of dinner (24h)          | -0.401      | 0.080    | 0.073        | 0.761    | -0.201       | 0.395    | -0.175            | 0.460    |
| MEQ score                     | -0.213      | 0.367    | -0.110       | 0.645    | -0.002       | 0.993    | 0.098             | 0.681    |
| MVPA (min/week)               | 0.582       | 0.007**  | 0.013        | 0.955    | 0.105        | 0.658    | 0.760             | 0.020*   |
| Step count (step/day)         | 0.383       | 0.096    | -0.012       | 0.960    | 0.080        | 0.738    | 0.868             | 0.001**  |
| VO <sub>2</sub> peak (ml/min) | 0.481       | 0.032*   | -0.248       | 0.293    | 0.293        | 0.209    | 0.150             | 0.527    |

Data are the Pearson's correlation coefficients.

\* Significant difference (P &lt; 0.05) , \*\* Significant difference (P &lt; 0.01)

Table S3

The relationships between physical characteristics of the participants and acrophase of clock genes expression (n = 20)

|                               | <i>PER3</i> |          | <i>NR1D1</i> |          | <i>NR1D2</i> |          | Physical activity |          |
|-------------------------------|-------------|----------|--------------|----------|--------------|----------|-------------------|----------|
|                               | Acrophase   |          | Acrophase    |          | Acrophase    |          | Acrophase         |          |
|                               | <i>r</i>    | <i>P</i> | <i>r</i>     | <i>P</i> | <i>r</i>     | <i>P</i> | <i>r</i>          | <i>P</i> |
| Age (years)                   | -0.053      | 0.823    | -0.212       | 0.371    | 0.052        | 0.826    | -0.226            | 0.337    |
| Body mass (kg)                | 0.470       | 0.037*   | 0.427        | 0.060    | -0.113       | 0.635    | -0.020            | 0.933    |
| Body mass index               | 0.290       | 0.215    | 0.180        | 0.448    | -0.220       | 0.351    | -0.216            | 0.260    |
| Time of breakfast (24h)       | 0.288       | 0.247    | 0.127        | 0.615    | -0.334       | 0.175    | 0.311             | 0.209    |
| Time of lunch (24h)           | 0.276       | 0.253    | 0.051        | 0.836    | -0.407       | 0.084    | 0.024             | 0.924    |
| Time of dinner (24h)          | 0.049       | 0.837    | 0.181        | 0.445    | -0.191       | 0.420    | 0.170             | 0.474    |
| MEQ score                     | -0.204      | 0.387    | -0.123       | 0.605    | 0.106        | 0.656    | -0.197            | 0.406    |
| MVPA (min/week)               | 0.458       | 0.042*   | 0.413        | 0.071    | 0.139        | 0.139    | 0.058             | 0.807    |
| Step count (step/day)         | 0.416       | 0.068    | 0.378        | 0.101    | 0.257        | 0.275    | -0.151            | 0.524    |
| VO <sub>2</sub> peak (ml/min) | 0.095       | 0.690    | -0.067       | 0.778    | 0.033        | 0.889    | 0.212             | 0.370    |

Data are the Pearson's correlation coefficients.

\* Significant difference (P &lt; 0.05)
